# Supplementary material for: Rapidly-changing subglacial hydrology pathways at a tidewater glacier revealed through simultaneous observations of water pressure, supraglacial lakes, meltwater plumes and surface velocities
Source: Copernicus journal article supplement (doi:10.5194/tc-2017-74), 2017-05-11
Supplement: Supplementary file [file tc-2017-74-AC3-supplement.pdf]

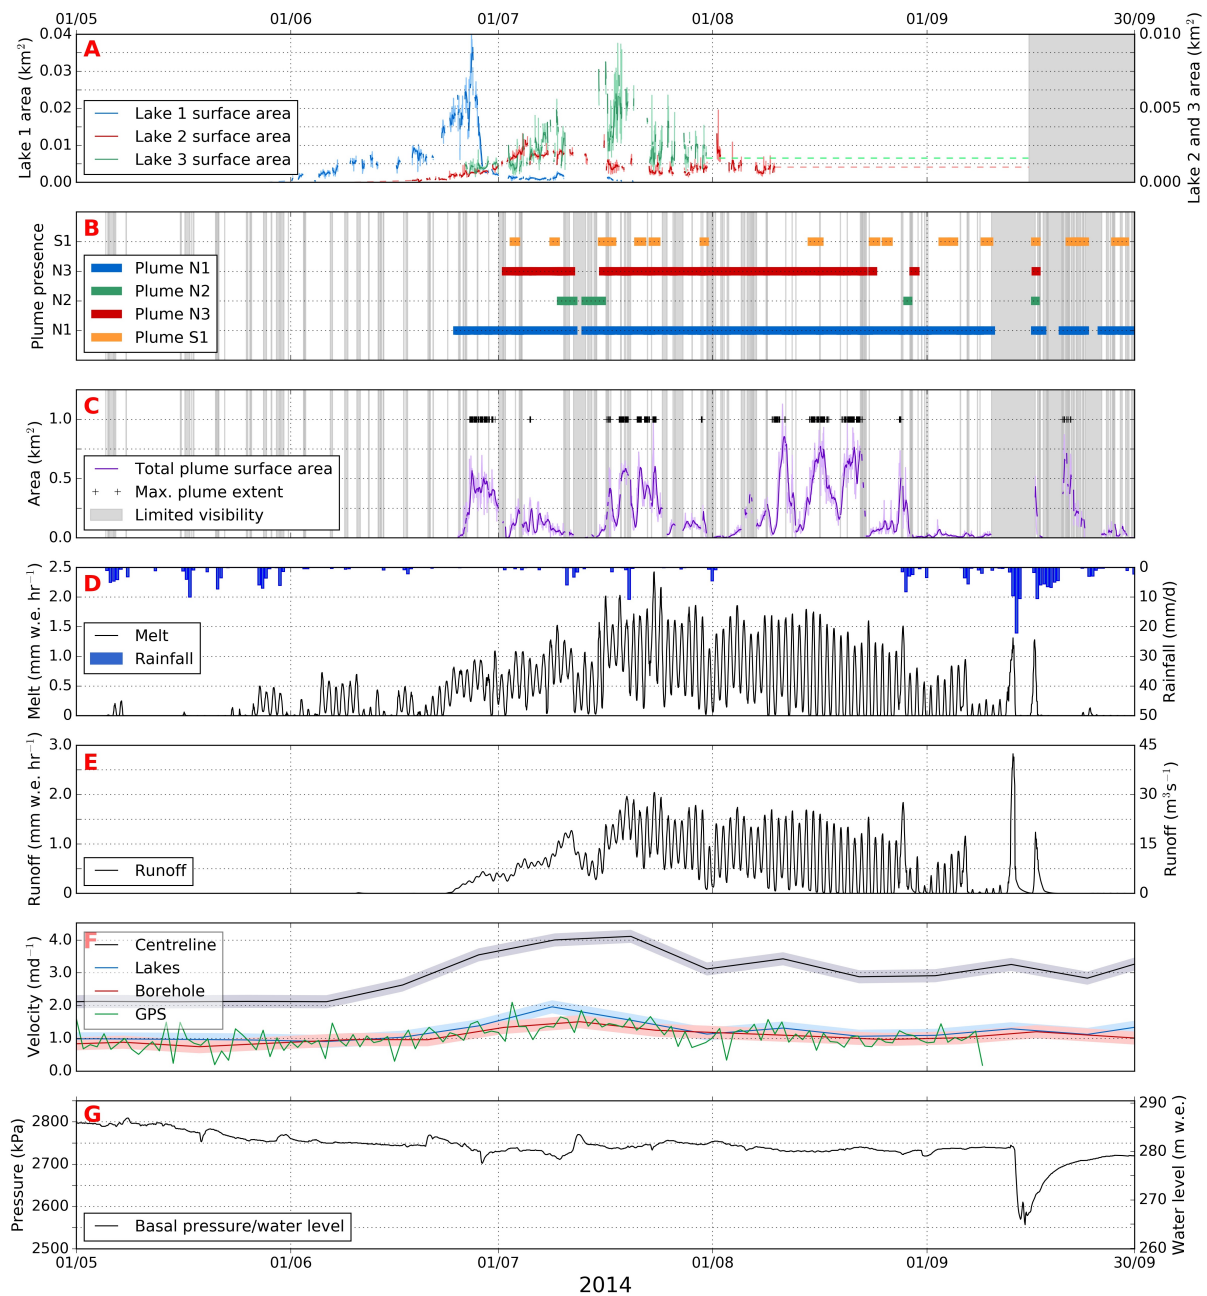

**Figure 2.** Composite graph showing hydrological results from Kronebreen, including GPS velocities (in panel F) from the borehole site. A) Surface area of the three visible lake clusters (moving averages included); B) Timeline of the appearance of the four plumes, three visible at the north side of the terminus (N1, N2, N3) and one visible from the south side (S1); C) Total surface area of Plume N1, N2 and N3 (moving averages included), plus episodes when the plume extent is out of the image frame (noted as "max. plume extent"); D) Modelled melt (0–500 m elevation) and precipitation; E) Modelled runoff (0–500 m elevation); F) Glacier surface velocities, with spatial averages from the glacier centreline (<2 km from the terminus), the region of the supraglacial lakes, and the location of the borehole site, and GPS velocities from the borehole site. The faint area around each velocity line is the uncertainty range (<0.4 m/day); G) Water-pressure and corresponding water level from the borehole site.
